# Supplementary material for: Cortical propagation tracks functional recovery after stroke
Source: PubMed Central journal article supplement (PMC8159272; doi:10.1371/journal.pcbi.1008963), 2021-05-17
Supplement: pcbi.1008963.s010.pdf [file pcbi.1008963.s010.pdf]

| Panel | Indicator  | Event type | Group   | Diff. type | p-value    |     |
|-------|------------|------------|---------|------------|------------|-----|
| c     | Duration   | Act-Pass   | Control | Variance   | 0.002      | **  |
| e     | Smoothness | F-nF       |         |            | 0.001      | **  |
|       |            | RP-nRP     |         |            | 0.001      | **  |
| g     | Angle      | F-nF       |         |            | $10^{-10}$ | *** |
|       |            | Act-Pass   |         |            | $10^{-9}$  | *** |
|       |            | RP-nRP     |         |            | $10^{-8}$  | *** |
