# Supplementary material for: Cortical propagation tracks functional recovery after stroke
Source: PubMed Central journal article supplement (PMC8159272; doi:10.1371/journal.pcbi.1008963), 2021-05-17
Supplement: pcbi.1008963.s011.pdf [file pcbi.1008963.s011.pdf]

| Panel | Indicator  | Event type | Group                  | Diff. type | p-value    |     |
|-------|------------|------------|------------------------|------------|------------|-----|
| a     | Duration   |            | Control - Acute stroke | Mean       | 0.003      | **  |
| b     |            | F          | Control - Acute stroke |            | 0.026      | *   |
|       |            | Act-Pass   | Control                |            | 0.042      | *   |
|       |            | Act        | Control - Acute stroke |            | 0.034      | *   |
|       |            | Pass       | Control - Acute stroke |            | 0.035      | *   |
|       |            | RP         | Control - Acute stroke |            | 0.014      | *   |
|       |            | nRP        | Control - Acute stroke |            | 0.028      | *   |
| c     | Smoothness |            | Control - Acute stroke |            | 0.007      | **  |
| d     |            | F - nF     | Control                |            | $10^{-10}$ | *** |
|       |            | F          | Control - Acute stroke |            | 0.004      | **  |
|       |            | Act        | Control - Acute stroke |            | 0.01       | *   |
|       |            | Pass       | Control - Acute stroke |            | 0.002      | **  |
|       |            | RP-nRP     | Control                |            | 0.008      | **  |
|       |            | RP         | Control - Acute stroke |            | 0.005      | **  |
| f     | Angle      | F - nF     | Control                | Variance   | $10^{-7}$  | *** |
|       |            |            | Acute stroke           |            | $10^{-5}$  | *** |
|       |            | Act - Pass | Control                |            | $10^{-4}$  | *** |
|       |            |            | Acute stroke           |            | 0.046      | *   |
