# Supplementary material for: Cortical propagation tracks functional recovery after stroke
Source: PubMed Central journal article supplement (PMC8159272; doi:10.1371/journal.pcbi.1008963), 2021-05-17
Supplement: pcbi.1008963.s013.pdf [file pcbi.1008963.s013.pdf]

| Panel | Indicator  | Event type | Group                | Diff. type | p-value   |     |
|-------|------------|------------|----------------------|------------|-----------|-----|
| d     | Smoothness | F - nF     | Control              | Mean       | $10^{-5}$ | *** |
|       |            |            | Pre-stroke           |            | $10^{-4}$ | *** |
|       |            | F          | Control - Pre-stroke |            | 0.049     | *   |
| f     | Angle      | F - nF     | Control              | Variance   | $10^{-4}$ | *** |
|       |            |            | Pre-stroke           |            | $10^{-9}$ | *** |
|       |            | Act - Pass | Control              |            | 0.012     | *   |
