# Supplementary material for: Cortical propagation tracks functional recovery after stroke
Source: PubMed Central journal article supplement (PMC8159272; doi:10.1371/journal.pcbi.1008963), 2021-05-17
Supplement: pcbi.1008963.s014.pdf [file pcbi.1008963.s014.pdf]

| Panel | Indicator  | Event type | Group                     | Diff. type | p-value   |     |
|-------|------------|------------|---------------------------|------------|-----------|-----|
| c     | Smoothness |            | Acute stroke - Untreated  | Mean       | 0.005     | **  |
| d     | Smoothness | Act - Pass | Acute stroke              |            | 0.038     | *   |
|       |            | Act        | Acute stroke - Untreated  | 0.023      | *         |     |
|       |            | Pass       |                           | 0.016      | *         |     |
| f     | Angle      | F - nF     | Acute stroke<br>Untreated | Variance   | $10^{-5}$ | *** |
|       |            |            |                           |            | 0.042     | *   |
