# Supplementary material for: Cortical propagation tracks functional recovery after stroke
Source: PubMed Central journal article supplement (PMC8159272; doi:10.1371/journal.pcbi.1008963), 2021-05-17
Supplement: pcbi.1008963.s015.pdf [file pcbi.1008963.s015.pdf]

| Indicator       | Group                | Diff. type | p-value       |
|-----------------|----------------------|------------|---------------|
| Asymmetry index | Untreated - Combined | Mean       | $10^{-4}$ *** |
|                 | Robot - Combined     |            | $10^{-5}$ *** |
|                 | Toxin - Combined     |            | $10^{-6}$ *** |
