# Supplementary material for: Cortical propagation tracks functional recovery after stroke
Source: PubMed Central journal article supplement (PMC8159272; doi:10.1371/journal.pcbi.1008963), 2021-05-17
Supplement: pcbi.1008963.s016.pdf [file pcbi.1008963.s016.pdf]

| Panel | Indicator          | Event type | Group              | Diff. type         | p-value   |       |
|-------|--------------------|------------|--------------------|--------------------|-----------|-------|
| a     | Duration           |            | Control - Combined | Mean               | $10^{-4}$ | ***   |
|       |                    |            | Robot - Combined   |                    | $10^{-6}$ | ***   |
| b     | Duration           | F          | Control - Combined |                    | 0.002     | **    |
|       |                    |            | Robot - Combined   |                    | $10^{-5}$ | ***   |
|       |                    | nF         | Control - Combined |                    | 0.002     | **    |
|       |                    |            | Robot - Combined   |                    | $10^{-5}$ | ***   |
|       |                    | Act        | Control - Combined |                    | 0.002     | **    |
|       |                    |            | Robot - Combined   |                    | $10^{-4}$ | ***   |
|       |                    | Pass       | Control - Combined |                    | $10^{-4}$ | ***   |
|       |                    |            | Robot - Combined   |                    | $10^{-5}$ | ***   |
| RP    | Control - Combined |            | 0.003              | **                 |           |       |
|       | Robot - Combined   |            | $10^{-6}$          | ***                |           |       |
| nRP   | Control - Combined |            | 0.002              | **                 |           |       |
|       | Robot - Combined   |            | $10^{-6}$          | ***                |           |       |
| c     | Smoothness         |            | Control - Combined |                    | 0.025     | *     |
|       |                    |            | Robot - Combined   |                    | $10^{-4}$ | ***   |
| d     | Smoothness         | F          | Robot - Combined   |                    | 0.001     | **    |
|       |                    |            | nF                 | Control - Combined |           | 0.018 |
|       |                    | Act        | Robot - Combined   |                    | 0.002     | **    |
|       |                    |            | Control - Robot    |                    | 0.046     | *     |
|       |                    | Pass       | Robot - Combined   |                    | $10^{-6}$ | ***   |
|       |                    |            | Control - Combined |                    | 0.030     | *     |
|       |                    | RP         | Robot - Combined   |                    | $10^{-6}$ | ***   |
|       |                    |            | Control - Combined |                    | 0.029     | *     |
| nRP   | Robot - Combined   |            | $10^{-5}$          | ***                |           |       |
|       | Control - Combined |            | 0.014              | *                  |           |       |
|       |                    |            | Robot - Combined   |                    | $10^{-4}$ | ***   |
|       |                    |            |                    |                    |           |       |
| f     | Angle              | F          | Control - Combined | Variance           | $10^{-8}$ | ***   |
|       |                    |            | Robot - Combined   |                    | $10^{-8}$ | ***   |
|       |                    | Act        | Control - Combined |                    | $10^{-9}$ | ***   |
|       |                    |            | Robot - Combined   |                    | $10^{-9}$ | ***   |
|       |                    | Pass       | Control - Combined |                    | 0.027     | *     |
|       |                    |            | Robot - Combined   |                    | 0.008     | **    |
|       |                    | RP         | Control - Combined |                    | $10^{-9}$ | ***   |
|       |                    |            | Robot - Combined   |                    | $10^{-9}$ | ***   |
| nRP   | Control - Robot    | 0.024      | *                  |                    |           |       |
|       | Robot - Combined   | $10^{-5}$  | ***                |                    |           |       |
