# Supplementary material for: Cortical propagation tracks functional recovery after stroke
Source: PLOS journal article supplement (doi:10.1371/journal.pcbi.1008963), 2021-05-17
Supplement: S12 (10.1371/journal.pcbi.1008963.s012) [file journal.pcbi.1008963.s012]

| Panel             | Indicator            | Event type    | Group                | Diff. type | p-value    |           |       |
|-------------------|----------------------|---------------|----------------------|------------|------------|-----------|-------|
| a                 | Duration             |               | Untreated - Combined | Mean       | $10^{-4}$  | ***       |       |
|                   |                      |               | Robot - Combined     |            | $10^{-5}$  | ***       |       |
|                   |                      |               | Toxin - Combined     |            | 0.006      | **        |       |
| b                 |                      | F             | Untreated - Combined |            | 0.001      | **        |       |
|                   |                      |               | Robot - Combined     |            | $10^{-5}$  | ***       |       |
|                   |                      |               | Toxin - Combined     |            | 0.035      | *         |       |
|                   |                      | nF            | Untreated - Combined |            | $10^{-6}$  | ***       |       |
|                   |                      |               | Robot - Combined     |            | $10^{-7}$  | ***       |       |
|                   |                      |               | Toxin - Combined     |            | 0.002      | **        |       |
|                   |                      | F-nF          | Untreated            |            | 0.037      | *         |       |
|                   |                      |               | Robot                |            | 0.020      | *         |       |
|                   |                      | Act           | Untreated - Combined |            | 0.002      | **        |       |
|                   |                      |               | Robot - Combined     |            | $10^{-5}$  | ***       |       |
|                   |                      | Pass          | Untreated - Combined |            | $10^{-4}$  | ***       |       |
|                   |                      |               | Robot - Combined     |            | $10^{-4}$  | ***       |       |
|                   |                      |               | Toxin - Combined     |            | 0.01       | *         |       |
|                   |                      | Act-Pass      | Toxin                |            | 0.015      | *         |       |
|                   |                      |               | RP                   |            | 0.006      | **        |       |
| nRP               | Untreated - Combined | $10^{-5}$     | ***                  |            |            |           |       |
|                   | Robot - Combined     | $10^{-4}$     | ***                  |            |            |           |       |
|                   | Toxin - Combined     | $10^{-5}$     | ***                  |            |            |           |       |
| RP-nRP            | Untreated - Combined | 0.003         | **                   |            |            |           |       |
|                   | Robot - Combined     | 0.006         | **                   |            |            |           |       |
|                   | Toxin                |               |                      |            |            |           |       |
| c                 | Smoothness           |               | Untreated - Toxin    |            | 0.029      | *         |       |
|                   |                      |               | Untreated - Combined |            | $10^{-5}$  | ***       |       |
|                   |                      |               | Robot - Combined     |            | $10^{-4}$  | ***       |       |
|                   |                      |               | Toxin - Combined     |            | 0.003      | **        |       |
| d                 |                      | F             | Untreated - Combined |            | $10^{-5}$  | ***       |       |
|                   |                      |               | Robot - Combined     |            | $10^{-4}$  | ***       |       |
|                   |                      |               | Toxin - Combined     |            | 0.019      | *         |       |
|                   |                      | nF            | Untreated - Combined |            | $10^{-5}$  | ***       |       |
|                   |                      |               | Robot - Combined     |            | $10^{-4}$  | ***       |       |
|                   |                      |               | Toxin - Combined     |            | $10^{-4}$  | ***       |       |
|                   |                      | F-nF          | Robot                |            | Variance   | 0.007     | **    |
|                   |                      |               | Toxin                |            |            | Mean      | 0.015 |
|                   |                      | Act           | Untreated - Combined |            |            | $10^{-4}$ | ***   |
|                   |                      |               | Robot - Combined     |            |            | $10^{-4}$ | ***   |
|                   |                      |               | Toxin - Combined     |            |            | 0.023     | *     |
|                   |                      | Pass          | Untreated - Combined |            |            | $10^{-5}$ | ***   |
|                   |                      |               | Robot - Combined     |            |            | $10^{-4}$ | ***   |
|                   |                      |               | Toxin - Combined     |            |            | 0.013     | *     |
|                   |                      | RP            | Untreated - Combined |            |            | $10^{-5}$ | ***   |
| Robot - Combined  | $10^{-5}$            |               | ***                  |            |            |           |       |
| Toxin - Combined  | 0.005                |               | **                   |            |            |           |       |
| nRP               | Untreated - Combined |               | $10^{-5}$            | ***        |            |           |       |
|                   | Robot - Combined     |               | $10^{-4}$            | ***        |            |           |       |
|                   | Toxin - Combined     |               | 0.010                | *          |            |           |       |
| e                 | Angle                |               | Untreated - Robot    | Variance   | 0.018      | *         |       |
|                   |                      |               | Robot - Toxin        |            | 0.005      | **        |       |
| f                 |                      | F             | Untreated - Robot    |            | 0.037      | *         |       |
|                   |                      |               | Robot - Toxin        |            | 0.003      | **        |       |
|                   |                      | F-nF          | Robot                |            | $10^{-10}$ | ***       |       |
|                   |                      |               | Act                  |            | 0.001      | **        |       |
|                   |                      | RP            | Untreated - Robot    |            | $10^{-4}$  | ***       |       |
| Robot - Toxin     | $10^{-5}$            |               | ***                  |            |            |           |       |
| Untreated - Robot | $10^{-5}$            |               | ***                  |            |            |           |       |
|                   |                      | Robot - Toxin | $10^{-4}$            | ***        |            |           |       |
